# Supplementary material
Source: MDPI journal article supplement (https://www.mdpi.com/2073-4395/10/5/669)
Supplement: s1 [file s1]

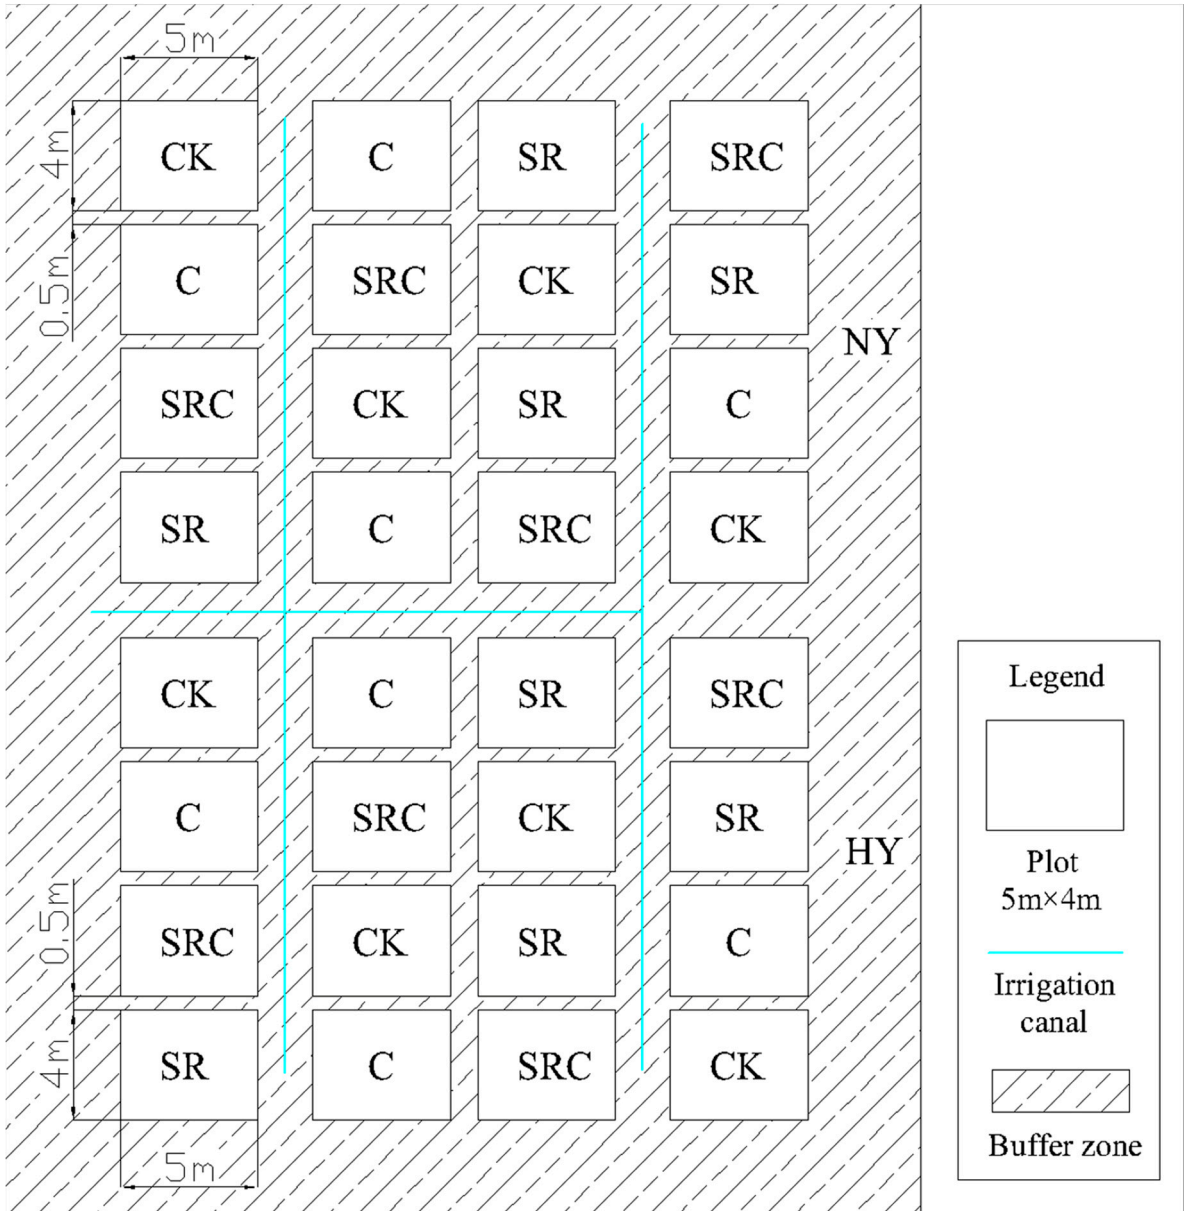

**Figure S1.** Schematic diagram of the field layout. NY, 90 kg N  $\text{hm}^{-2}$  and 45 kg P  $\text{hm}^{-2}$  and HY, 270 kg N  $\text{hm}^{-2}$ , and 135 kg P  $\text{hm}^{-2}$ . CK, sand only; C, sand and biochar; SR, sand and soft rock; SRC, sand, biochar, and soft rock. The blue line indicated the PVC pipe for irrigation, and slash indicated the buffer zone.

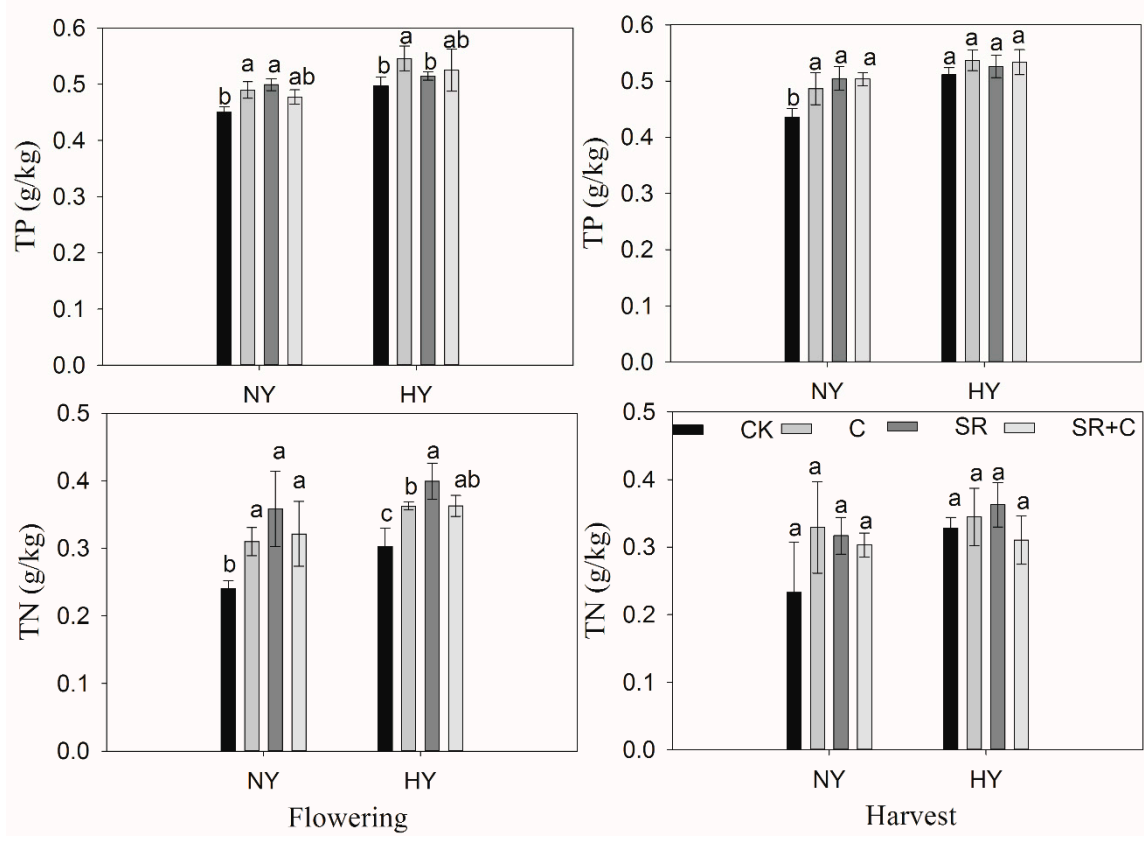

**Figure S2.** Effects of biochar and soft rock treatments on soil total nitrogen (TN) and phosphorus (TP) at two fertilizer levels in 2019. CK, sand only; C, sand and biochar; SR, sand and soft rock; SRC, sand, biochar, and soft rock; NY, normal yield pattern; HY, high yield pattern.
